# Supplementary material
Source: publisher figshare collection journal article supplement (https://karger.figshare.com/ndownloader/files/28285419)
Supplement: Supplementary file 1 [file 28285419]

Supplemental Table 1. Comparisons between CKD patients with and without diabetes mellitus.

|  | Patients with  diabetes mellitus | Patients without  diabetes mellitus | *P* |
| --- | --- | --- | --- |
| Male / female | 18/8 | 46/46 | 0.082 |
| Age, years | 67 [62 - 74] | 69 [53 - 75] | 0.690 |
| eGFR, ml/min/1.73m2 | 37.4 [15.7 - 47.9] | 31.2 [16.1 - 44.3] | 0.459 |
| Creatinine, mg/dL | 1.36 [1.20 - 3.00] | 1.61 [1.16 - 2.67] | 0.866 |
| Blood urea nitrogen, mg/dL | 23.5 [19.0 - 32.3] | 25.0 [19.0 - 41.3] | 0.657 |
| Total protein, g/dL | 6.7 ± 0.7 | 6.7 ± 0.7 | 0.872 |
| Albumin, g/dL | 3.8 [3.6 - 4.0] | 3.8 [3.5 - 4.0] | 0.903 |
| Alanine transaminase, IU/L | 15 [13 - 24] | 14 [10 - 20] | 0.886 |
| Aspartate transaminase, IU/L | 20 [16 - 23] | 20 [16 - 24] | 0.230 |
| Uric acid, mg/dL | 6.4 ± 1.4 | 6.8 ± 1.5 | 0.214 |
| Hemoglobin, g/dL | 12.9 ± 1.99 | 12.5 ± 1.71 | 0.217 |
| Iron, μg/dL | 96.8 ± 25.2 | 79.5 ± 29.5 | 0.005* |
| Ferritin, ng/mL | 111 [47.5 - 145] | 60.5 [31.7 - 169] | 0.152 |
| Plasma glucose, mg/dL | 131 [106 - 164] | 96 [85 - 105] | <0.001* |
| Hemoglobin A1c, % | 6.5 [6.0 - 7.1] | 5.5 [5.3 - 5.7] | <0.001* |
| CRP, mg/L | 0.06 [0.03 - 0.13] | 0.05 [0.02 - 0.17] | 0.971 |
| Phosphate, mg/dL | 4.4 [4.1 - 4.5] | 3.7 [3.4 - 4.3] | 0.073 |
| Corrected calcium, mg/dL | 9.4 [9.3 - 9.6] | 9.5 [9.2 - 9.8] | 0.283 |
| Intact PTH, pg/mL | 65.9 [44.0 - 1 29] | 71.9 [38.2- 1 28] | 0.904 |
| FGF-23, pg/mL | 65 [49 - 103] | 74.0 [51.0- 1 20] | 0.306 |
| Urinary protein, g/gCr | 1.04 [0.26 - 3.22] | 1.18 [0.26 - 3.30] | 0.784 |
| XOR, pmol/h/mL | 62.7 [32.3 - 122] | 25.7 [13.4 - 45.8] | <0.001* |

**p* < 0.05

Data are expressed as the mean ± SD. Median values [interquartile range] are shown for variables with skewed distributions. CKD: chronic kidney disease,eGFR: estimated glomerular filtration rate,CRP: C-reactive protein, PTH: parathyroid hormone, FGF-23: fibroblast growth factor-23, XOR: xanthine oxidoreductase.
